# Supplementary material
Source: Springer Nature journal article supplement (https://www.springermedizin.de/resource/supplementary/12916_2010_306_MOESM4_ESM.pdf/9599598)

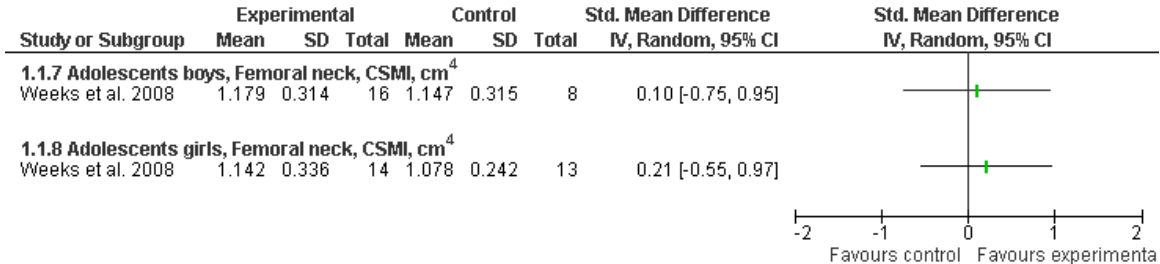

Supplement: MOESM4 [file 9599598]
